# Supplementary material
Source: publisher site journal article supplement (http://www.dovepress.com/get_supplementary_file.php?f=235975.docx)
Supplement: Supplementary file 1 [file get_supplementary_file.php]

**Supplementary Table 1 Clinical and genotypic characteristics of the 5 CIKA strains**

| Sample ID | Sample Source | Isolation Date | Resistance genes | | | | | |
| --- | --- | --- | --- | --- | --- | --- | --- | --- |
|  |  |  | Carbapenemase  genes | ESBLs  genes | AmpC  genes | Porin genes | ARD gens | QRD genes |
| CIKA-1 | secretion | 09-2015 | - | - | *bla*EBC,  *bla*ACC | *ompE35*, *ompE36* | *acc（6'）-1b* | *qnrD*, *qnrS* |
| CIKA-2 | sputum | 09-2017 | - | - | *bla*EBC, *bla*ACC | *ompE35*, *ompE36* | - | *qnrD* |
| CIKA-3 | blood | 12-2017 | - | - | *bla*ACC | *ompE35*, *ompE36* | *armA* | *qnrD*, *qnrS* |
| CIKA-4 | sputum | 03-2018 | - | - | *bla*ACC | *ompE35*, *ompE36* | - | *qnrD*, *qnrS* |
| CIKA-5 | sputum | 07-2018 | - | - | *bla*ACC | *ompE35*, *ompE36* | - | *qnrD*, *qnrS* |

Abbreviations: CIKA, Carbapenem-intermediate *Klebsiella aerogenes*; ESBLs, Extended Spectrum Beta-Lactamases; QRD, quinolone resistance determinants; ARD, aminoglycoside resistance determinants; “-”, not detected.

**Supplementary Figure 1** **Distribution of Carbapenem sensitivity of 892 *Klebsiella aerogenes* isolates from 2012-2018 in our hospital**


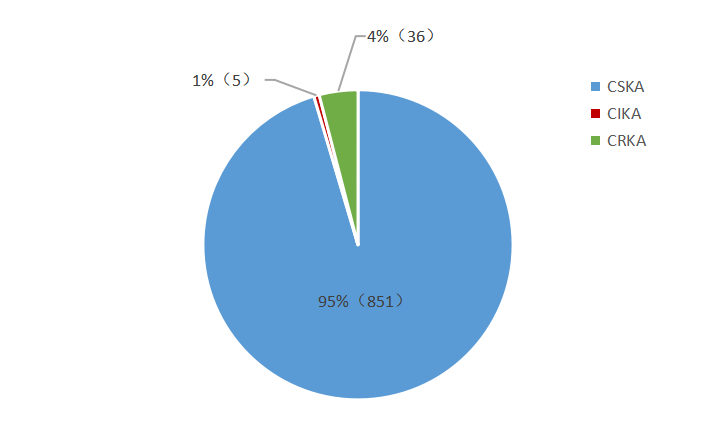


**Abbreviations:** CRKA, carbapenem-resistant *Klebsiella aerogenes*; CIKA, carbapenem-intermediate *Klebsiella aerogenes*; CSKA，carbapenem-susceptible *Klebsiella aerogenes*.
